# Supplementary material
Source: PubMed Central journal article supplement (PMC6056901)
Supplement: WertzSupplementalMaterial.pdf [file WertzSupplementalMaterial.pdf]

**SUPPLEMENTARY MATERIALS****Supplementary Table S1. Repeat of main analyses, using non-clumped and clumped polygenic scores.**

|                                                                                                                 | E-Risk cohort        |                      | Dunedin cohort       |                      |
|-----------------------------------------------------------------------------------------------------------------|----------------------|----------------------|----------------------|----------------------|
|                                                                                                                 | Not-clumped          | Clumped              | Not-clumped          | Clumped              |
|                                                                                                                 | IRR (95% CI)         | IRR (95% CI)         | IRR (95% CI)         | IRR (95% CI)         |
| Panel A. Effect of participants' polygenic scores on their official records of offending                        | 1.33<br>(1.13, 1.55) | 1.40<br>(1.19, 1.65) | 1.21<br>(1.09, 1.34) | 1.22<br>(1.10, 1.35) |
| Panel B. Polygenic effect on offending, accounting for a criminogenic family environment                        | 1.20<br>(1.01, 1.42) | 1.20<br>(1.00, 1.43) | 1.17<br>(1.05, 1.30) | 1.19<br>(1.07, 1.34) |
| Panel C. Polygenic effect on offending, accounting for leaving school with poor qualifications                  | 1.19<br>(1.02, 1.39) | 1.25<br>(1.07, 1.46) | 1.14<br>(1.03, 1.26) | 1.14<br>(1.03, 1.26) |
| Panel D. Polygenic effect on offending, accounting for early-emerging psychological and behavioral risk factors | 1.22<br>(1.05, 1.42) | 1.27<br>(1.08, 1.49) | 1.14<br>(1.02, 1.27) | 1.15<br>(1.04, 1.29) |

*Note:* Clumped scores were computed using a 500kb window and an  $R^2$  threshold of 0.1, following Ripke et al. (2014). Clumped polygenic scores were residualized for the first ten principal components and residuals were standardized to Mean=0, Standard deviation=1. We reverse-coded the score, so that a higher score indicates a greater genetic risk for low educational attainment.

**Supplementary Table S2. Repeat of main analyses in the E-Risk cohort, using only one randomly selected twin per pair.**

|                                                                                                                 | E-Risk cohort        |
|-----------------------------------------------------------------------------------------------------------------|----------------------|
|                                                                                                                 | IRR (95% CI)         |
| Panel A. Effect of participants' polygenic scores on their official records of offending                        | 1.44<br>(1.16, 1.79) |
| Panel B. Polygenic effect on offending, accounting for a criminogenic family environment                        | 1.31<br>(1.04, 1.66) |
| Panel C. Polygenic effect on offending, accounting for leaving school with poor qualifications                  | 1.27<br>(1.03, 1.58) |
| Panel D. Polygenic effect on offending, accounting for early-emerging psychological and behavioral risk factors | 1.35<br>(1.10, 1.66) |

**Supplementary Table S3. R<sup>2</sup> and pseudo-R<sup>2</sup>-based measures of effect-size for all outcomes.**

| Outcome                                 | E-Risk cohort  |                       | Dunedin cohort |                       |
|-----------------------------------------|----------------|-----------------------|----------------|-----------------------|
|                                         | R <sup>2</sup> | pseudo R <sup>2</sup> | R <sup>2</sup> | pseudo R <sup>2</sup> |
| Offending                               | -              | 0.012                 | -              | 0.008                 |
| Socioeconomic deprivation               | 0.052          | -                     | 0.024          | -                     |
| Parental antisocial behavior            | 0.004          | -                     | 0.015          | -                     |
| Leaving school with poor qualifications | -              | 0.015                 | -              | 0.015                 |
| Low cognitive ability                   | 0.019          | -                     | 0.044          | -                     |
| Low self-control                        | 0.003          | -                     | 0.015          | -                     |
| Academic difficulties in primary school | 0.019          | -                     | 0.035          | -                     |
| Truancy                                 | -              | 0.003                 | -              | 0.012                 |

*Note:* R<sup>2</sup>s are reported for continuous outcomes; pseudo R<sup>2</sup>s are reported for dichotomous outcomes. R<sup>2</sup> estimates may be downwardly biased because of the substantial measurement error contained in polygenic scores. For a discussion of methods to correct for this attenuation, see Tucker-Drob (2017).

**Supplementary Table S4. Participants cautioned or convicted among those with low, average, and high polygenic scores for educational attainment.** Although the risk for a criminal record was increased among participants with low polygenic scores for education, the majority had no criminal record.

|                                                    | E-Risk cohort                 | Dunedin cohort                |
|----------------------------------------------------|-------------------------------|-------------------------------|
|                                                    | % cautioned or convicted (N)* | % cautioned or convicted (N)* |
| Low polygenic score for educational attainment     | 15.7% (50)                    | 34.2% (51)                    |
| Average polygenic score for educational attainment | 10.2% (128)                   | 27.8% (167)                   |
| High polygenic score for educational attainment    | 6.3% (18)                     | 13.4% (20)                    |

\*The % and N express the percentage and number of people with a criminal record, among participants with low (<1 *SD* below the mean), average (within 1 *SD* of mean), and high (>1 *SD* above the mean) polygenic scores for educational attainment.

**Supplementary Table S5. Formal mediation analyses in the E-Risk and Dunedin cohorts.**

|                                                                                                 | E-Risk cohort      | Dunedin cohort     |
|-------------------------------------------------------------------------------------------------|--------------------|--------------------|
|                                                                                                 | Estimate (95% CI)* | Estimate (95% CI)* |
| <b>Mediator model (Poor qualifications)</b>                                                     |                    |                    |
| Total effect                                                                                    | .18 (.08, .28)     | .16 (.07, .24)     |
| Direct effect                                                                                   | .11 (.01, .21)     | .10 (.02, .18)     |
| Total indirect effect                                                                           | .07 (.04, .10)     | .06 (.03, .09)     |
| % Mediation                                                                                     | 39%                | 38%                |
| <b>Mediator model (Low cognitive ability, low self-control, academic difficulties, truancy)</b> |                    |                    |
| Total effect                                                                                    | .17 (.07, .26)     | .16 (.07, .24)     |
| Direct effect                                                                                   | .12 (.03, .21)     | .11 (.02, .19)     |
| Total indirect effect                                                                           | .05 (.02, .08)     | .05 (.01, .09)     |
| % Mediation                                                                                     | 29%                | 31%                |

\* Indicates standardized estimates of total, direct and indirect effects in mediation models. 95% confidence intervals (CI) were obtained from 500 bootstrap replications; in E-Risk, this was done accounting for the clustering of the twin data.

## Genetics and crime

### References

- Ripke, S., Neale, B. M., Corvin, A., Walters, J. T., Farh, K. H., Holmans, P. A., ... & Pers, T. H. (2014). Biological insights from 108 schizophrenia-associated genetic loci. *Nature*, *511*, 421-427.
- Tucker-Drob, E. (2017). Measurement error correction of genome-wide polygenic scores in prediction samples. *BioRxiv*.
